# Supplementary material for: Individual Sensory Modality Dominance as an Influential Factor in the Prefrontal Neurofeedback Training for Spatial Processing: A Functional Near-Infrared Spectroscopy Study
Source: PubMed Central journal article supplement (PMC8866872; doi:10.3389/fnsys.2022.774475), 2022-02-10
Supplement: Data_Sheet_1.pdf [file Data_Sheet_1.pdf]

## Supplementary Material

### 1 Supplementary Figure

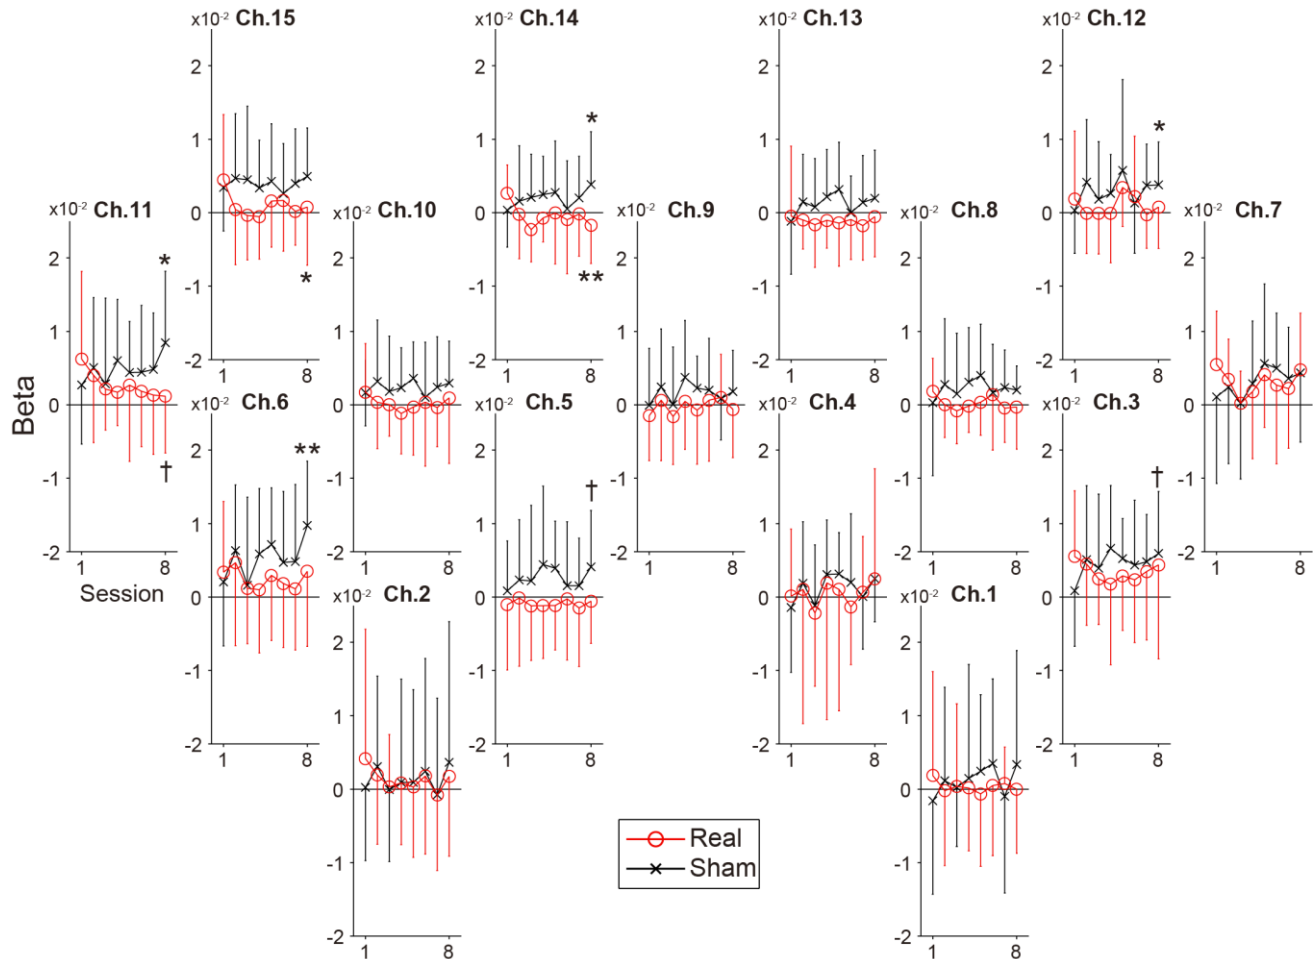

**Supplementary Figure 1.** Oxy-Hb beta value transitions for all recording channels. The asterisk and dagger signs indicate the significance in the simple-simple main effect test when comparing beta values between the first and eighth sessions in the same group. The error bars denote the standard deviation. † $p < 0.1$ , \* $p < 0.05$ , \*\* $p < 0.01$

## 2 Supplementary Tables

**Supplementary Table 1.** Statistical values obtained from the three-way ANOVA of the beta values of oxy-Hb in the first and eighth sessions.

|                                          | <i>F</i> -value<br>[ <i>F</i> (1,38)] | <i>P</i> -value | Effect size<br>(Partial $\eta^2$ ) |
|------------------------------------------|---------------------------------------|-----------------|------------------------------------|
| Group                                    | 0.014                                 | 0.91            | 0.00038                            |
| Session                                  | 0.35                                  | 0.56            | 0.0092                             |
| *Group $\times$ Session                  | 7.40                                  | 0.0098          | 0.16                               |
| Channel                                  | 0.54                                  | 0.47            | 0.014                              |
| *Group $\times$ Channel                  | 4.82                                  | 0.034           | 0.11                               |
| Session $\times$ Channel                 | 0.23                                  | 0.64            | 0.0059                             |
| †Group $\times$ Session $\times$ Channel | 3.13                                  | 0.085           | 0.76                               |

**Supplementary Table 2.** Statistical values obtained from the three-way ANOVA of the beta values of deoxy-Hb in the first and eighth sessions.

|                                         | <i>F</i> -value<br>[ <i>F</i> (1,38)] | <i>P</i> -value | Effect size<br>(Partial $\eta^2$ ) |
|-----------------------------------------|---------------------------------------|-----------------|------------------------------------|
| Group                                   | 1.17                                  | 0.17            | 0.030                              |
| Session                                 | 0.14                                  | 0.71            | 0.0037                             |
| †Group $\times$ Session                 | 3.61                                  | 0.065           | 0.087                              |
| Channel                                 | 0.49                                  | 0.49            | 0.013                              |
| Group $\times$ Channel                  | 1.19                                  | 0.28            | 0.030                              |
| Session $\times$ Channel                | 0.93                                  | 0.34            | 0.024                              |
| Group $\times$ Session $\times$ Channel | 1.04                                  | 0.32            | 0.027                              |

**Supplementary Table 3.** Statistical values obtained from the three-way ANOVA of the searching costs in the Pre-WM task.

|                                         | <i>F</i> -value<br>[ <i>F</i> (1,38)] | <i>P</i> -value        | Effect size<br>(Partial $\eta^2$ ) |
|-----------------------------------------|---------------------------------------|------------------------|------------------------------------|
| Group                                   | 1.48                                  | 0.23                   | 0.037                              |
| *Trial                                  | 101.93                                | $2.62 \times 10^{-12}$ | 0.73                               |
| Group $\times$ Trial                    | 0.093                                 | 0.76                   | 0.0024                             |
| Condition                               | 2.16                                  | 0.15                   | 0.054                              |
| Group $\times$ Condition                | 0.016                                 | 0.90                   | 0.00041                            |
| Trial $\times$ Condition                | 1.38                                  | 0.25                   | 0.035                              |
| Group $\times$ Trial $\times$ Condition | 0.39                                  | 0.54                   | 0.010                              |

**Supplementary Table 4.** Statistical values obtained from the three-way ANOVA of the searching costs in the Post-WM task.

|                                         | <i>F</i> -value<br>[ <i>F</i> (1,38)] | <i>P</i> -value       | Effect size<br>(Partial $\eta^2$ ) |
|-----------------------------------------|---------------------------------------|-----------------------|------------------------------------|
| <sup>†</sup> Group                      | 3.27                                  | 0.079                 | 0.079                              |
| *Trial                                  | 50.34                                 | $1.82 \times 10^{-8}$ | 0.57                               |
| Group $\times$ Trial                    | $2.54 \times 10^{-7}$                 | 0.99                  | $6.67 \times 10^{-9}$              |
| Condition                               | 1.03                                  | 0.32                  | 0.026                              |
| *Group $\times$ Condition               | 13.43                                 | 0.00075               | 0.26                               |
| Trial $\times$ Condition                | 1.94                                  | 0.17                  | 0.048                              |
| Group $\times$ Trial $\times$ Condition | 2.57                                  | 0.12                  | 0.063                              |
